# Supplementary material
Source: PubMed Central journal article supplement (PMC2762667)
Supplement: 0908530106_0908530106SI.pdf [file 0908530106_0908530106SI.pdf]

# Supporting Information

Farenhorst et al. 10.1073/pnas.0908530106

Table S1. Details of mosquito species used: abbreviations, colony names, resistance selection, and origin

| Species                | Abbreviation                   | Colony name |           | Selected for resistance to | Origin                |
|------------------------|--------------------------------|-------------|-----------|----------------------------|-----------------------|
|                        |                                | Baseline    | Resistant |                            |                       |
| <i>A. funestus</i>     | Af <sup>Perm</sup>             | FUMAZ       | FUMAZ-R   | Permethrin                 | Southern Mozambique   |
| <i>A. arabiensis</i>   | Aa <sub>1</sub> <sup>DDT</sup> | MBN         | MBN-DDT   | DDT                        | Mamfene, South Africa |
|                        | Aa <sub>2</sub> <sup>DDT</sup> | SENN        | SENN-DDT  | DDT                        | Sennar, Sudan         |
| <i>A. gambiae</i> s.s. | Ag <sup>Bend</sup>             | SOG         | BENROG    | Bendiocarb                 | Obuasi, Ghana         |
|                        | Ag <sup>MR</sup>               | -           | GAH       | -                          | Ahafo, Ghana          |

**Table S2. Insecticide susceptibility status of the mosquito colonies and species used**

| Colony                 | Pyrethroid          |                       | Carbamate          |                  | Organophosphate | Organochlorine |                |
|------------------------|---------------------|-----------------------|--------------------|------------------|-----------------|----------------|----------------|
|                        | 0.75%<br>Permethrin | 0.05%<br>Deltamethrin | 0.1%<br>Bendiocarb | 0.1%<br>Propoxur | 5%<br>Malathion | 4%<br>DDT      | 4%<br>Dieldrin |
| <i>A. funestus</i>     |                     |                       |                    |                  |                 |                |                |
| FUMOS                  | R                   | R                     | S                  | R                | S               | S              | S              |
| FUMOS-R                | R                   | R                     | S                  | R                | S               | S              | S              |
| <i>A. arabiensis</i>   |                     |                       |                    |                  |                 |                |                |
| MBN                    | S                   | S                     | S                  | S                | S               | S              | S              |
| MBN-DDT                | R                   | R                     | R                  | S                | R               | R              | S              |
| SENN                   | R                   | S                     | S                  | S                | S               | S              | R              |
| SENN-DDT               | R                   | R                     | S                  | S                | R               | R              | R              |
| <i>A. gambiae</i> s.s. |                     |                       |                    |                  |                 |                |                |
| SOG                    | R                   | R                     | S                  | R                | S               | R              | R              |
| BENROG                 | R                   | R                     | R                  | R                | S               | R              | R              |
| GAH                    | R                   | R                     | R                  | R                | R               | R              | R              |

Colonies were tested for their susceptibility to the insecticides listed according to the World Health Organization standard protocol (1). Those colonies showing mean percentage mortalities >95% were labeled susceptible. S, insecticide susceptible; R, insecticide resistant.

1. World Health Organization (1998) Test Procedures for Insecticide Resistance Monitoring in Malaria Vectors, Bio-Efficacy and Persistence of Insecticides on Treated Surfaces (WHO, Geneva).
